# Supplementary material for: Genomic testing for children with interstitial and diffuse lung disease (chILD): parent satisfaction, understanding and health-related quality of life
Source: PubMed Central journal article supplement — BMJ Open Respir Res. 2022 Feb 21;9(1):e001139. doi: 10.1136/bmjresp-2021-001139 (PMC8862491; doi:10.1136/bmjresp-2021-001139), 2022-02-21
Supplement: bmjresp-2021-001139supp001.pdf [file bmjresp-2021-001139supp001.pdf]

### Supplementary file 1. Diagnostic labels of chILD

#### Classification of chILD (based on Deutsch et al, 2007)

| <b>DISORDERS MORE PREVALENT IN INFANCY</b>                                                                                                                                                                                                                                                                                                                                               | <b>DISORDERS LESS PREVALENT IN INFANCY</b>                                                                                                                                                                                                  |
|------------------------------------------------------------------------------------------------------------------------------------------------------------------------------------------------------------------------------------------------------------------------------------------------------------------------------------------------------------------------------------------|---------------------------------------------------------------------------------------------------------------------------------------------------------------------------------------------------------------------------------------------|
| <b>Diffuse developmental disorders of the lung:</b><br>Acinar dysplasia<br>Congenital alveolar dysplasia<br>Alveolar capillary dysplasia with misalignment of pulmonary veins                                                                                                                                                                                                            | <b>Disorders related to systemic disease processes:</b><br>Immune mediated/collagen-vascular disorders<br>Storage disease<br>Sarcoidosis<br>Langerhans cell histiocytosis<br>Malignant infiltrates                                          |
| <b>Lung growth abnormalities reflecting deficient alveolarisation:</b><br>Pulmonary hypoplasia<br>Chronic neonatal lung disease<br>Related to chromosomal disorders<br>Related to congenital heart disease                                                                                                                                                                               | <b>Disorders of the normal host:</b><br>Related to infections<br>Related to environmental agents<br>- hypersensitivity pneumonitis<br>- toxic inhalation<br>Aspiration syndromes<br>Eosinophilic pneumonia                                  |
| <b>Specific conditions of undefined cause:</b><br>Neuroendocrine cell hyperplasia of infancy<br>Pulmonary interstitial glycogenosis                                                                                                                                                                                                                                                      | <b>Disorders masquerading as ILD:</b><br>Arterial hypertensive vasculopathy<br>Congestive changes related to cardiac dysfunction<br>Venous-occlusive disease<br>Lymphatic disorders                                                         |
| <b>Inherited surfactant disorders:</b><br>Surfactant protein B mutations<br>Surfactant protein C mutations<br>ABCA3 mutations<br>Histology consistent with surfactant dysfunction without a yet recognised genetic aetiology<br>- pulmonary alveolar proteinosis<br>- chronic pneumonitis of infancy<br>- desquamative interstitial pneumonitis<br>- non-specific interstitial pneumonia | <b>Disorders of the immunocompromised host:</b><br>Opportunistic infection<br>Disorders related to therapeutic intervention<br>Disorders related to transplantation and rejection syndromes<br>Diffuse alveolar damage of unknown aetiology |

Deutsch GH, Young LR, Deterding RR, Fan LL, Dell SD, Bean JA, Brody AS, Noguee LM, Trapnell BC, Langson CL. Diffuse lung disease in young children. Application of a novel classification system. *Am J Res Crit Care Med* 2007;176;1120-1128
